# Supplementary material for: Silicotungstic acid as a highly efficient coreactant for luminol chemiluminescence for sensitive detection of uric acid
Source: Royal Society of Chemistry journal article supplement (doi:10.1039/c9an02600b), 2020-01-01
Supplement: c9an02600b1.pdf [file c9an02600b1.pdf]

## Supplementary Information

### Silicotungstic acid as highly efficient coreactant of luminol chemiluminescence for sensitive detection of uric acid

Islam M. Mostafa<sup>a,b,c</sup>, Mohamed Ibrahim Halawa<sup>a,d</sup>, Yequan Chen<sup>a</sup>, Abubakar Abdussalam<sup>a,b</sup>, Yiran Guan<sup>a,b,\*</sup>, Guobao Xu<sup>a,b,\*</sup>

<sup>a</sup> State Key Laboratory of Electroanalytical Chemistry, Changchun Institute of Applied Chemistry, Chinese Academy of Sciences, Changchun, Jilin 130022, PR China

<sup>b</sup> University of Science and Technology of China, Hefei, 230000, PR China

<sup>c</sup> Department of Analytical Chemistry, Faculty of Pharmacy, Minia University, 61519, Minia, Egypt

<sup>d</sup> Department of Pharmaceutical Analytical Chemistry, Faculty of Pharmacy, University of Mansoura, 35516, Mansoura, Egypt

#### Table of Contents

**Scheme S1.** Schematic diagram of the flow injection chemiluminescence system

**Fig. S1.** CL spectrum of luminol-STA system.

**Fig. S2.** Effect of the length of the pre-reaction coil on luminol-STA system

**Fig. S3.** Reproducibility for measurement of 40  $\mu\text{M}$  luminol

**Fig. S4.** Reproducibility for measurement of 1  $\mu\text{M}$  STA

**Table S1.** Comparison of different methods for the detection of UA

**Table S2.** Analytical results for the detection of UA in real urine sample

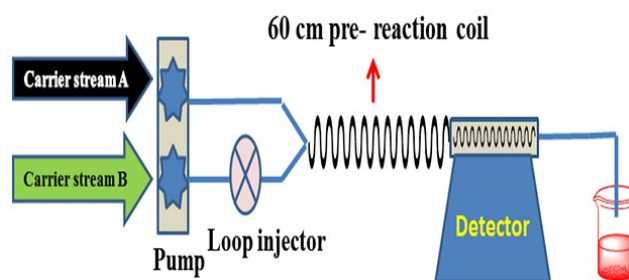

**Scheme S1.** Schematic diagram of the used flow injection system. (A) and (B) are the flow channels connected to pump system which is connected to loop injector. On the other side there is a 60 cm pre-reaction coil before CL cell and (F) is the waste cup.

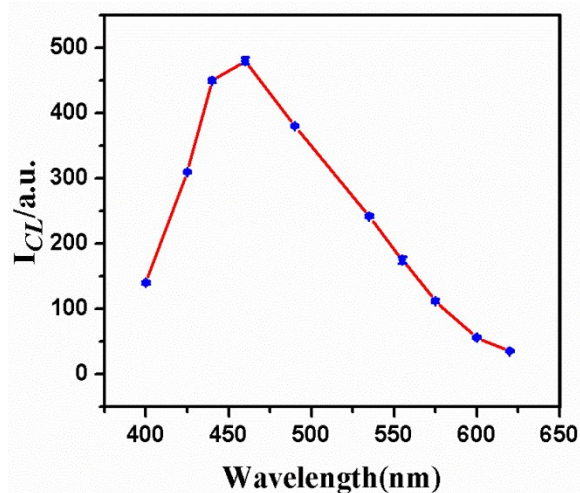

**Fig. S1.** CL spectrum of luminol-STA system. [Luminol]: 10  $\mu$ M; [STA]: 1 mM; [pH]: 12.0; PMT voltage: 950 V.

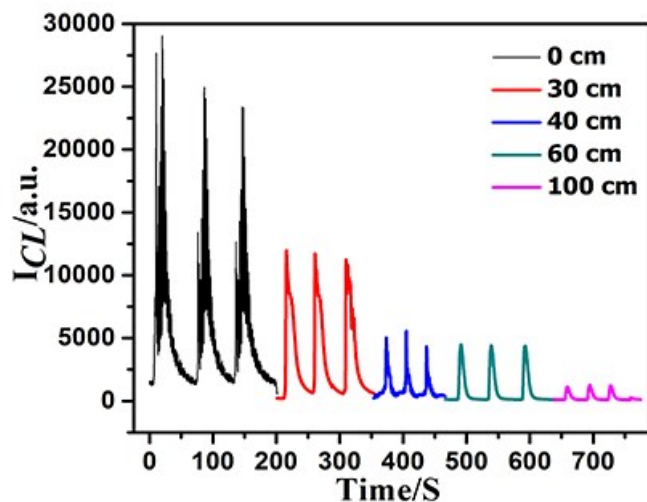

**Fig. S2.** Effect of the length of the pre-reaction coil on luminol-STA system. The CL kinetic profiles were recorded in the presence of 10  $\mu\text{M}$  luminol and 2 mM STA at pH 12.0; PMT voltage: 800 V.

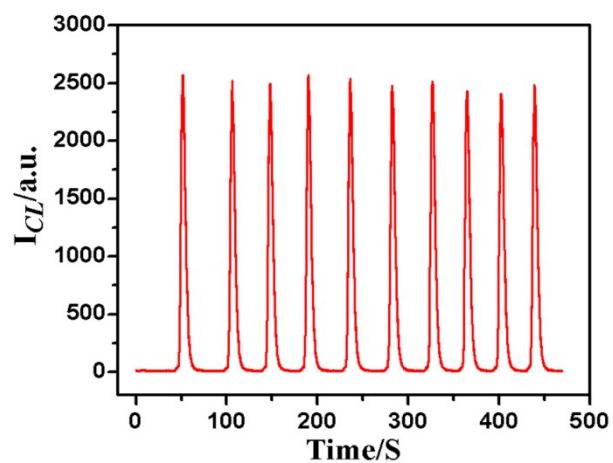

**Fig. S3.** Reproducibility for measurement of 40  $\mu\text{M}$  luminol, 1 mM STA at pH 12.0; PMT voltage: 1000 V.

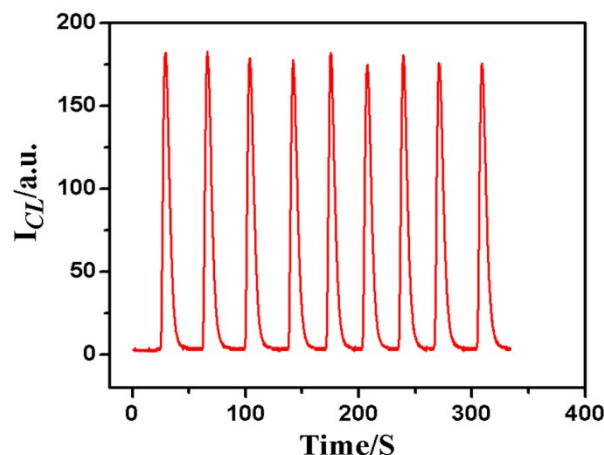

**Fig. S4.** Reproducibility for measurement of 1  $\mu\text{M}$  STA and 10  $\mu\text{M}$  luminol at pH 12.0; PMT voltage: 800 V.

**Table S1.** Comparison of different methods for the detection of UA

| Analytical Method                                | Linear                  | LOD                | Ref.       |
|--------------------------------------------------|-------------------------|--------------------|------------|
| CE-luminol- $\text{K}_3[\text{Fe}(\text{CN})_6]$ | 0.6–30 $\mu\text{M}$    | 0.4 $\mu\text{M}$  | 1          |
| Uricase/AuNP/MWCNT                               | 10-800 $\mu\text{M}$    | 10 $\mu\text{M}$   | 2          |
| $\text{KMnO}_4$ -OP                              | 0.6–3600 $\mu\text{M}$  | 0.3 $\mu\text{M}$  | 3          |
| CL biosensor                                     | 6–600 $\mu\text{M}$     | 0.6 $\mu\text{M}$  | 4          |
| Uricase/HRP-CdS quantum dots                     | 125-1000 $\mu\text{M}$  | 125 $\mu\text{M}$  | 5          |
| Luminol- $\text{K}_3[\text{Fe}(\text{CN})_6]$    | 4.8–179 $\mu\text{M}$   | 3 $\mu\text{M}$    | 6          |
| HoFNPs/MWCNTs/GCE                                | 0.2-500.0 $\mu\text{M}$ | 0.16 $\mu\text{M}$ | 7          |
| Luminol-DPA                                      | 0.4–200 $\mu\text{M}$   | 0.12 $\mu\text{M}$ | 8          |
| Uricase/MIL-53(Fe)                               | 4.5-60 $\mu\text{M}$    | 1.3 $\mu\text{M}$  | 9          |
| CdTe nanoparticles/ $\text{H}_2\text{O}_2$       | 0.2-6.0 $\mu\text{M}$   | 0.10 $\mu\text{M}$ | 10         |
| Luminol-STA                                      | 1-5000 nM               | 0.75 nM            | Our method |

**Table S2.** Analytical results for the detection of UA in real urine sample

| Sample | Concentrations of UA         |                    |                           | RSD<br>(n=3;%) |     |
|--------|------------------------------|--------------------|---------------------------|----------------|-----|
|        | Amount detected <sup>a</sup> | Amount added       | Amount found <sup>b</sup> |                |     |
| Urine  | 1.30 $\mu\text{M}$           | 0.0 $\mu\text{M}$  | -                         | -              | 3.1 |
|        |                              | 0.10 $\mu\text{M}$ | 1.42 $\mu\text{M}$        | 101.7          | 3.1 |
|        |                              | 0.50 $\mu\text{M}$ | 1.79 $\mu\text{M}$        | 99.6           | 4.2 |
|        |                              | 1.00 $\mu\text{M}$ | 2.35 $\mu\text{M}$        | 102.3          | 3.0 |

<sup>a,b</sup> average of three determinations.

## References

1. S. Zhao, J. Wang, F. Ye and Y.-M. Liu, *Anal. Biochem.*, 2008, **378**, 127-131.
2. N. Chauhan and C. S. Pundir, *Anal Biochem*, 2011, **413**, 97-103.
3. Z. Li, M. Feng and J. Lu, *Microchem J*, 1998, **59**, 278-283.
4. Y. Lv, Z. Zhang and F. Chen, *Analyst*, 2002, **127**, 1176-1179.
5. N. E. Azmi, N. I. Ramli, J. Abdullah, M. A. Abdul Hamid, H. Sidek, S. Abd Rahman, N. Ariffin and N. A. Yusof, *Biosens. Bioelectron.*, 2015, **67**, 129-133.
6. D. He, Z. Zhang, Y. Huang, Y. Hu, H. Zhou and D. Chen, *Luminescence*, 2005, **20**, 271-275.
7. M. Noroozifar, M. Khorasani-Motlagh, F. Z. Jahromi and S. Rostami, *Sens. Actuators B: Chem*, 2013, **188**, 65-72.
8. C. Yang and Z. Zhang, *Talanta*, 2010, **81**, 477-481.
9. J. Lu, Y. Xiong, C. Liao and F. Ye, *Anal. Methods*, 2015, **7**, 9894-9899.
10. D. Jin, M.-H. Seo, B. T. Huy, Q.-T. Pham, M. L. Conte, D. Thangadurai and Y.-I. Lee, *Biosens. Bioelectron.*, 2016, **77**, 359-365.
